# Supplementary material for: Synthesis and spectroscopic properties of novel meso-cyano boron-pyridyl-isoindoline dyes
Source: Royal Society of Chemistry journal article supplement (doi:10.1039/c4ob01077a), 2014-08-20
Supplement: c4ob01077a1.pdf [file c4ob01077a1.pdf]

# Synthesis and Spectroscopic Properties of Novel *Meso*-cyano Boron-pyridyl-isoindoline Dyes

Hui Liu, Hua Lu\* Fan Wu, Zhifang Li, Nagao Kobayashi and Zhen Shen,

## I. Supplementary Figure

Figure S1 ( $^1\text{H}$  NMR spectra of **1** and it's precursor) .....S1

Figure S2 (TD-DFT spectra of **1** and **2**) .....S2

## II. Supplementary data

$^1\text{H}$  NMR spectra and High HR-MS.....S3-S5

..

## I. Supplementary Figure

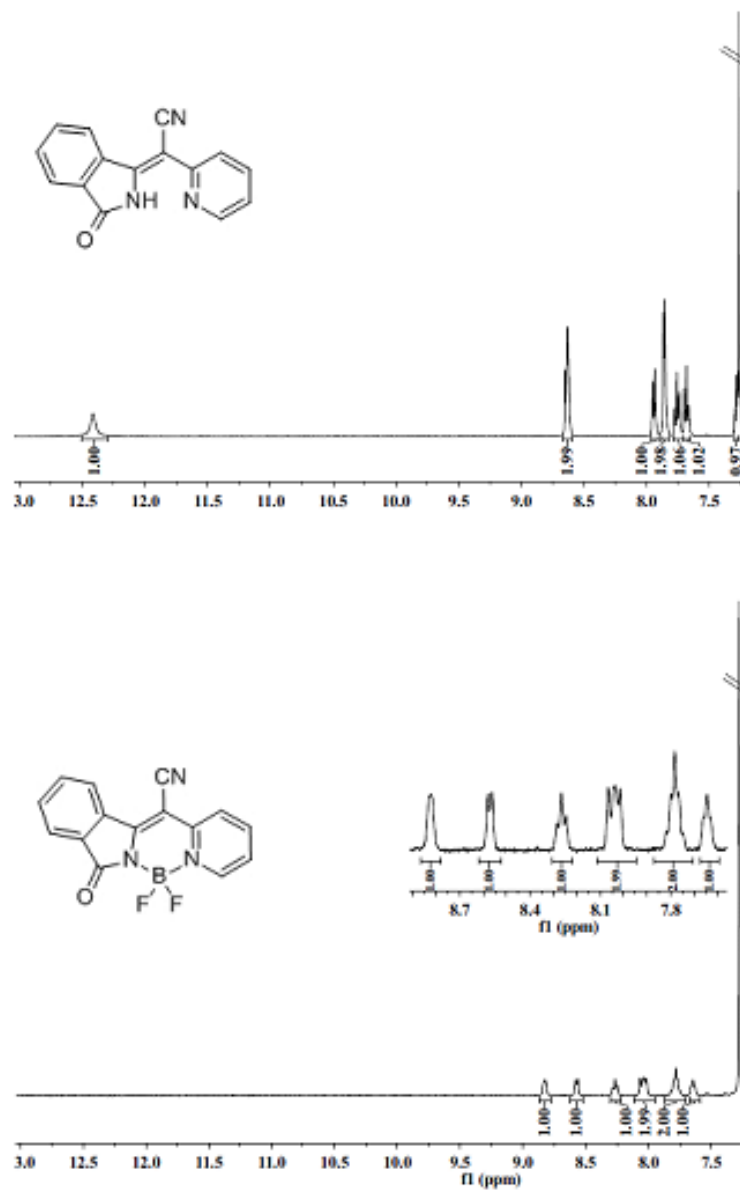

**Figure S1.** <sup>1</sup>H NMR spectra of **1** and its precursor.

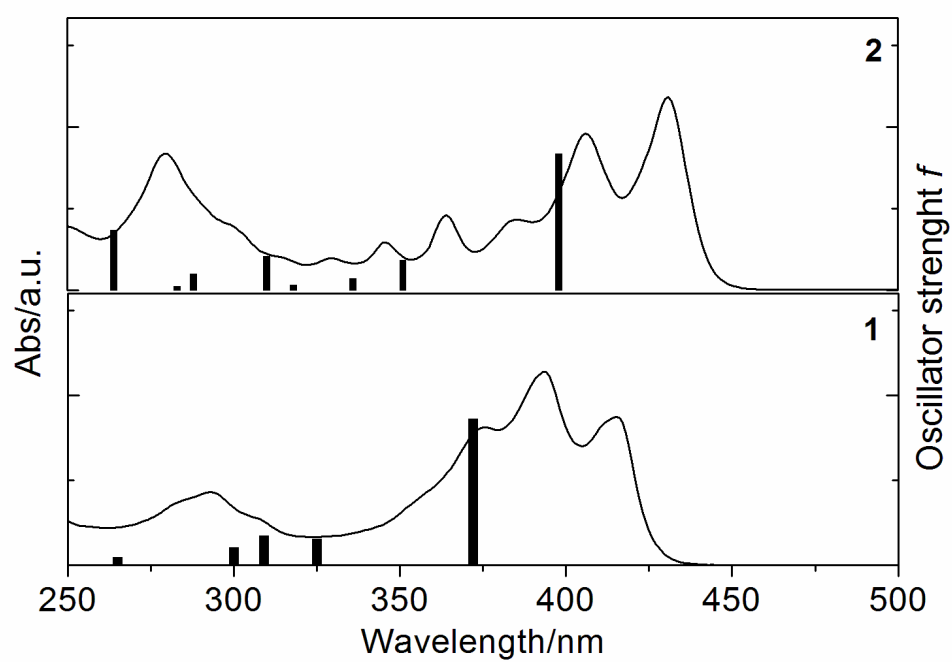

**Figure S2** TD-DFT spectra of **1** and **2** calculated using the B3LYP functional with 6-31G(d) basis sets. The experimental spectra of **1** and **2** are plotted against a secondary axis.

## II. Supplementary data

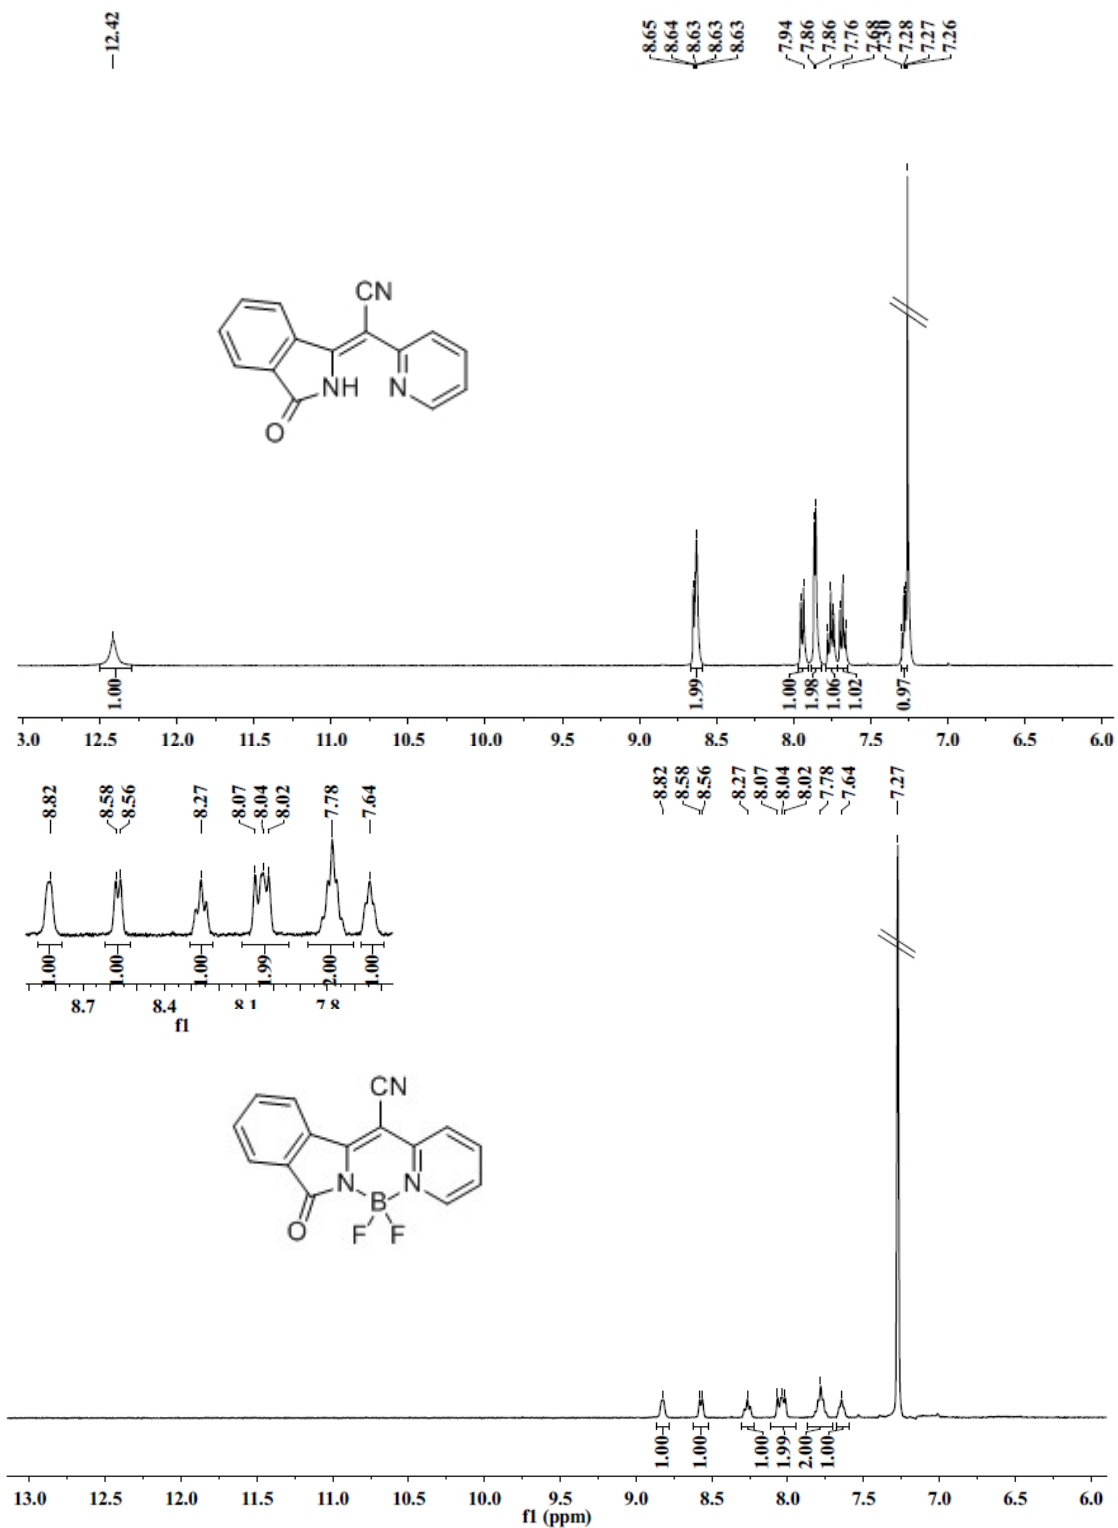

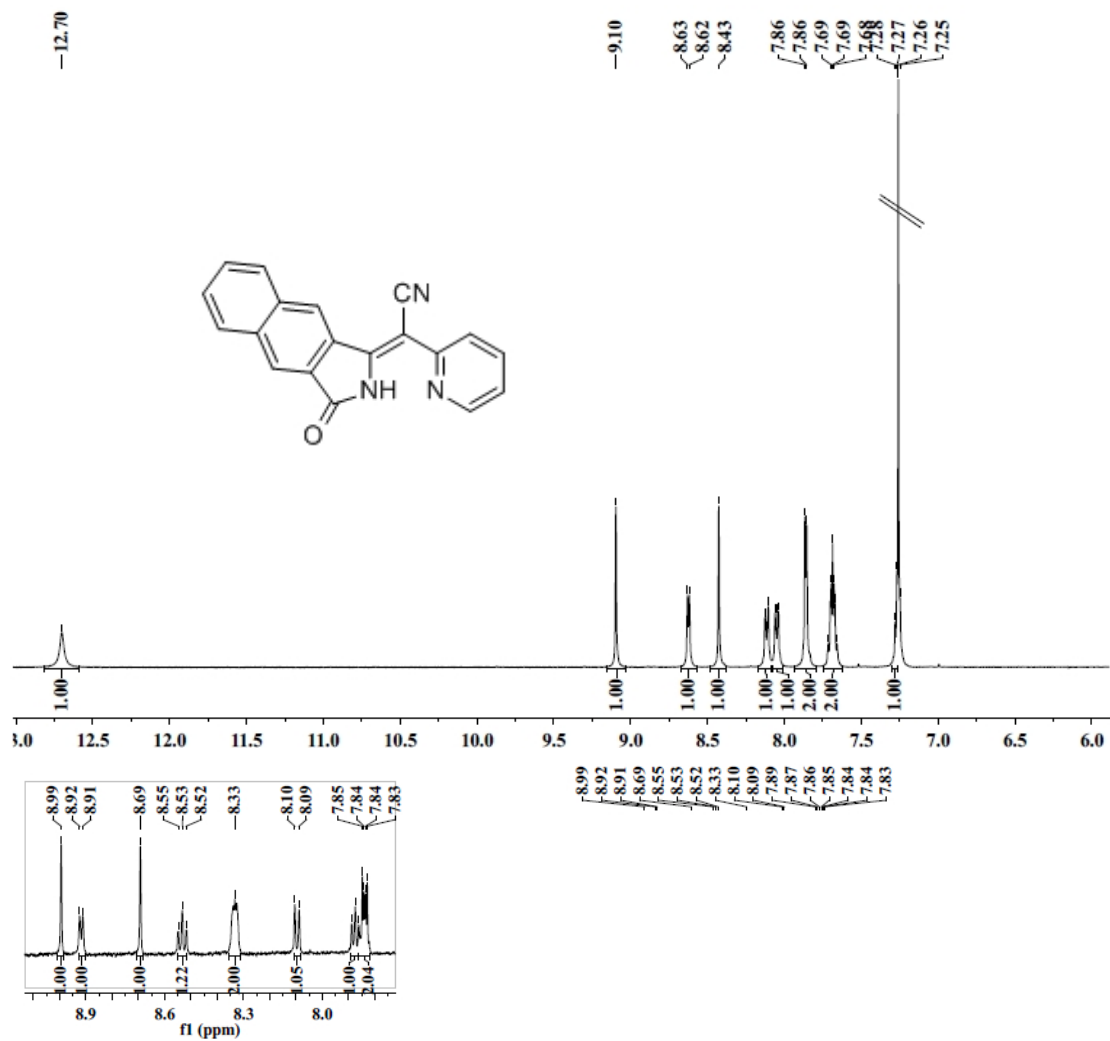

In d<sub>6</sub>-DMSO

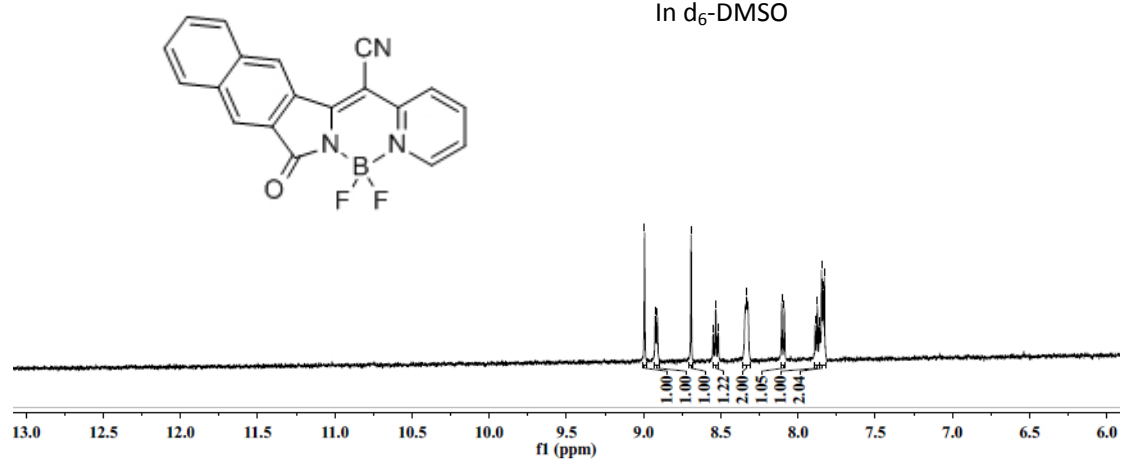

**Acquisition Parameter**

|             |         |                       |           |                  |           |
|-------------|---------|-----------------------|-----------|------------------|-----------|
| Source Type | ESI     | Ion Polarity          | Positive  | Set Nebulizer    | 0.4 Bar   |
| Focus       | Active  | Set Capillary         | 4500 V    | Set Dry Heater   | 180 °C    |
| Scan Begin  | 50 m/z  | Set End Plate Offset  | -500 V    | Set Dry Gas      | 4.0 l/min |
| Scan End    | 500 m/z | Set Collision Cell RF | 120.0 Vpp | Set Divert Valve | Source    |

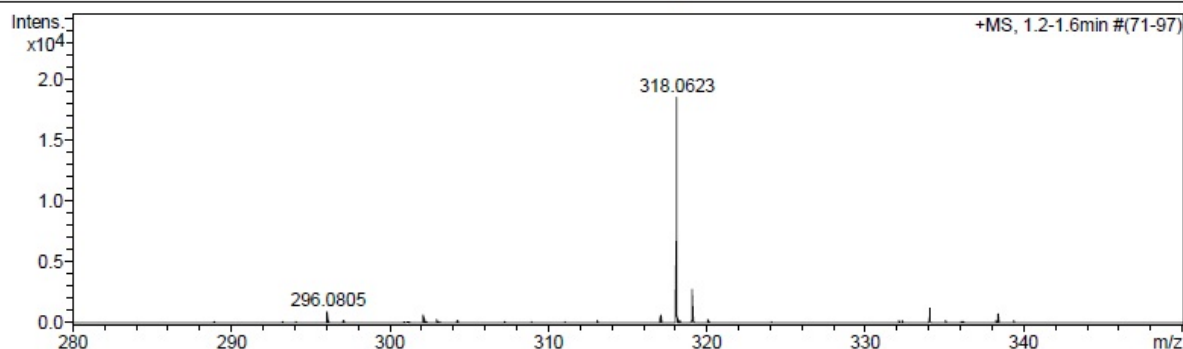

| Meas. m/z | # | Formula                                                            | Score  | m/z      | err [mDa] | err [ppm] | mSigma | rdB  | e <sup>-</sup> Conf | N-Rule |
|-----------|---|--------------------------------------------------------------------|--------|----------|-----------|-----------|--------|------|---------------------|--------|
| 296.0805  | 1 | C <sub>15</sub> H <sub>9</sub> BF <sub>2</sub> N <sub>3</sub> O    | 100.00 | 296.0804 | -0.1      | -0.2      | 634.3  | 12.5 | even                | ok     |
| 318.0623  | 1 | C <sub>15</sub> H <sub>8</sub> BF <sub>2</sub> N <sub>3</sub> Na O | 100.00 | 318.0623 | 0.0       | 0.1       | 102.6  | 12.5 | even                | ok     |
| 334.0373  | 1 | C <sub>15</sub> H <sub>8</sub> BF <sub>2</sub> KN <sub>3</sub> O   | 100.00 | 334.0363 | -1.0      | -3.0      | 569.7  | 12.5 | even                | ok     |

**Acquisition Parameter**

|             |         |                       |           |                  |           |
|-------------|---------|-----------------------|-----------|------------------|-----------|
| Source Type | ESI     | Ion Polarity          | Positive  | Set Nebulizer    | 0.4 Bar   |
| Focus       | Active  | Set Capillary         | 4500 V    | Set Dry Heater   | 180 °C    |
| Scan Begin  | 50 m/z  | Set End Plate Offset  | -500 V    | Set Dry Gas      | 4.0 l/min |
| Scan End    | 500 m/z | Set Collision Cell RF | 120.0 Vpp | Set Divert Valve | Source    |

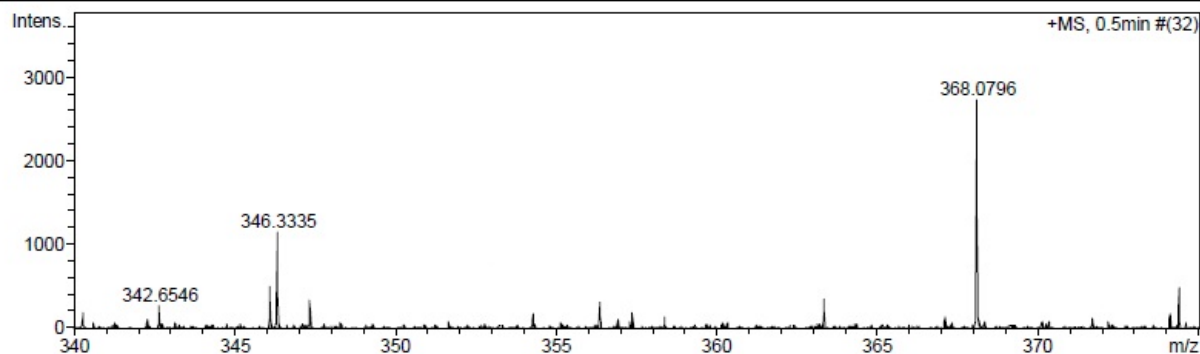

| Meas. m/z | # | Formula                                                             | Score  | m/z      | err [mDa] | err [ppm] | mSigma | rdB  | e <sup>-</sup> Conf | N-Rule |
|-----------|---|---------------------------------------------------------------------|--------|----------|-----------|-----------|--------|------|---------------------|--------|
| 346.0976  | 1 | C <sub>19</sub> H <sub>11</sub> BF <sub>2</sub> N <sub>3</sub> O    | 100.00 | 346.0961 | -1.5      | -4.3      | 638.2  | 15.5 | even                | ok     |
| 368.0796  | 1 | C <sub>19</sub> H <sub>10</sub> BF <sub>2</sub> N <sub>3</sub> Na O | 100.00 | 368.0781 | -1.5      | -4.2      | 94.2   | 15.5 | even                | ok     |

Maldi-Tof High Mass spectra of **1-2**
